# Supplementary material for: L-amino acid oxidase-1 is involved in the gut-liver axis by regulating 5-aminolevulinic acid production in mice
Source: PubMed Central journal article supplement — J Vet Med Sci. 2023 May 3;85(6):672–9. doi: 10.1292/jvms.23-0080 (PMC10315547; doi:10.1292/jvms.23-0080), 2023-05-03
Supplement: jvms-85-672-s001.pdf [file jvms-85-672-s001.pdf]

1 **Qasimi et al, 2022.**

2

3

Table 1S, Represent the primer pairs were used for analysis of the related gene expression.

| Gene                               | F-primer             | R-primer             |
|------------------------------------|----------------------|----------------------|
| <b>TNF-<math>\alpha</math></b>     | agcccccagtctgtatcctt | ctccctttgcagaactcagg |
| <b>IL-6</b>                        | agttgccttcttgggactga | tccacgatttcccagagaac |
| <b>PPAR-<math>\alpha</math></b>    | gagggttgagctcagtcagg | ggtcacctacgagtggcatt |
| <b>PPAR-<math>\gamma</math></b>    | ttttcaagggtgccagtttc | aatccttggccctctgagat |
| <b>LAO1</b>                        | tggccaagaagagtggaatc | agctcccactaccaccacac |
| <b><math>\alpha</math>-Tubulin</b> | gctgaccagtgcacgggt   | aaacctggggggctgggt   |

4

5

6
